# Supplementary material for: Ideas and perspectives: Heat stress: more than hot air
Source: Copernicus journal article supplement (doi:10.5194/bg-13-5821-2016), 2016-10-24
Supplement: Supplementary file 1 [file bg-13-5821-2016-supplement.zip]

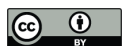

## *Supplement of*

# **Ideas and perspectives: Heat stress: more than hot air**

**Hans J. De Boeck et al.**

*Correspondence to:* Hans J. De Boeck ([hans.deboeck@uantwerp.be](mailto:hans.deboeck@uantwerp.be))

- [bg-13-5821-2016-supplement-title-page.pdf](#)
- [LeafTemp\\_serre.m](#)
- [bg-2016-102-supplement-version4.pdf](#)
- [esT.m](#)

The copyright of individual parts of the supplement might differ from the CC-BY 3.0 licence.
